# Supplementary material
Source: PubMed Central journal article supplement (PMC2268782)

**A**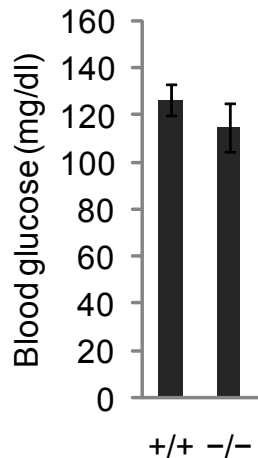**B**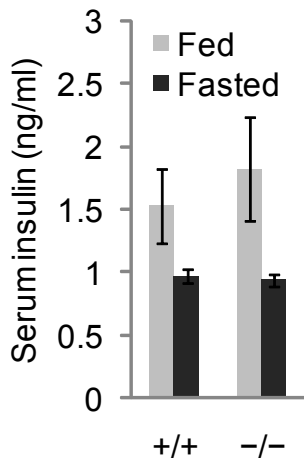**C**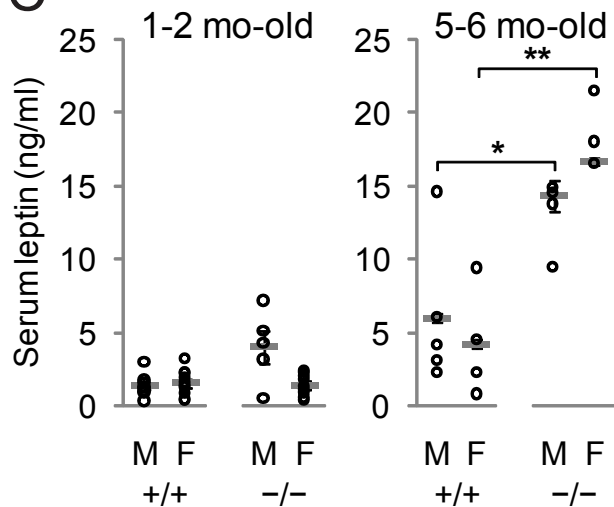**D**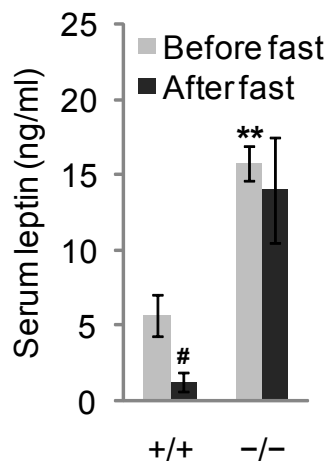

Supplement: pnas_0800096105_1.pdf [file pnas_0800096105_1.pdf]

**A***Ubb*<sup>+/+</sup>*Ubc*<sup>+/-</sup>*Ubb*<sup>+/-</sup>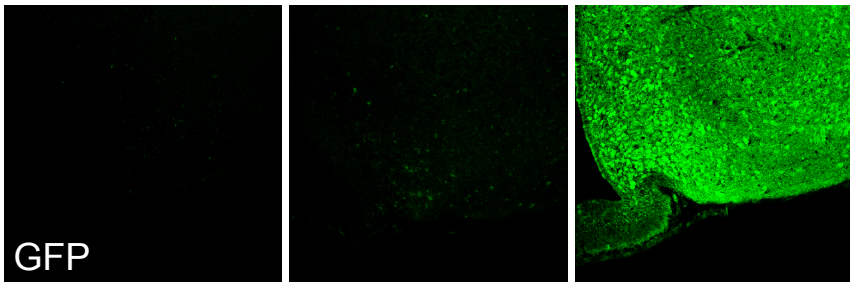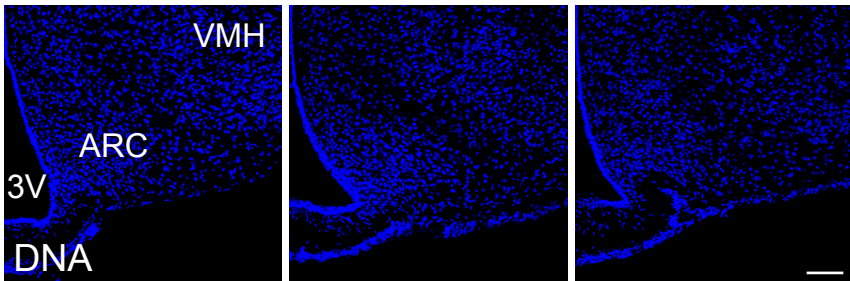**B***Ubc*<sup>+/-</sup>*Ubb*<sup>+/-</sup>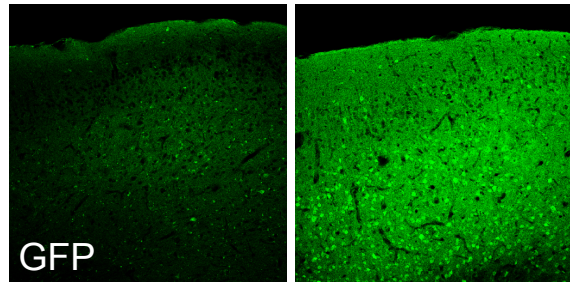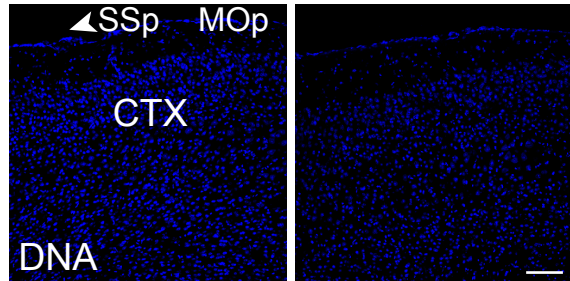

Supplement: pnas_0800096105_2.pdf [file pnas_0800096105_2.pdf]
